# Supplementary material
Source: PubMed Central journal article supplement (PMC7141855)
Supplement: btz870_supplementary_data.pdf [file btz870_supplementary_data.pdf]

## Supplementary Information for

### Docking Model Evaluation by 3D Deep Convolutional Neural Networks

Xiao Wang<sup>1</sup>, Genki Terashi<sup>2</sup>, Charles W. Christoffer<sup>1</sup>, Mengmeng Zhu<sup>2</sup>, and Daisuke Kihara<sup>2, 1, \*</sup>

<sup>1</sup>Department of Computer Science, Purdue University, West Lafayette, IN, 47907, USA,

<sup>2</sup>Department of Biological Sciences, Purdue University, West Lafayette, IN, 47907, USA.

\* Contact: dkihara@purdue.edu

#### Supplementary Table S1. Grouping of ZDock benchmark dataset by structural similarity.

Group 1: 1AKJ

Group 2: 1AY7

Group 3: 1AZS

Group 4: 1B6C

Group 5: 1BUH, 1FQ1, 1JWH, 2OZA

Group 6: 1DFJ

Group 7: 1FC2, 1FCC

Group 8: 1A2K, 1I2M, 1BKD, 1HE1, 1HE8, 1WQ1, 2FJU, 2OT3, 3CPH, 1I4D, 2NZ8

Group 9: 1EER

Group 10: 1EFN, 1GCQ

Group 11: 1F34

Group 12: 1F51

Group 13: 2O8V

Group 14: 1FFW

Group 15: 3D5S

Group 16: 1GLA

Group 17: 1GPW

Group 18: 1GXD, 2J0T

Group 19: 1H9D

Group 20: 1HCF

Group 21: 1IJK

Group 22: 1JIW

Group 23: 1JK9

Group 24: 1JTG

Group 25: 1JZD, 1Z5Y

Group 26: 1K74

Group 27: 1KAC

Group 28: 1SBB

Group 29: 1KTZ

Group 30: 1MAH

Group 31: 1ML0

Group 32: 1MQ8

Group 33: 1NW9  
Group 34: 1OC0  
Group 35: 1ACB, 1AVX, 1CGI, 1D6R, 1EAW, 1EZU, 1FAK, 1FLE, 1GL1, 1HIA, 2SNI,  
2UUY, 1AHW, 1BJ1, 1BVK, 1DQJ, 1E6J, 1FSK, 1I9R, 1IQD, 1JPS, 1KXQ, 1VFB,  
1WEJ, 2FD6, 2JEL, 1AK4, 1RV6, 2I25, 1BVN, 1CLV, 1TMQ, 1R0R, 3SGQ, 1K4C,  
1QFW, 2SIC, 2I9B  
Group 36: 1PVH  
Group 37: 1PXV  
Group 38: 1QA9  
Group 39: 1R6Q  
Group 40: 1RLB  
Group 41: 1S1Q, 1XD3, 2AYO, 2OOB  
Group 42: 1SYX  
Group 43: 1T6B  
Group 44: 1UDI  
Group 45: 1US7  
Group 46: 1XQS  
Group 47: 1XU1  
Group 48: 1ZHI  
Group 49: 2ABZ  
Group 50: 2A5T  
Group 51: 2AJF  
Group 52: 2B42  
Group 53: 2B4J  
Group 54: 2CFH  
Group 55: 2HLE  
Group 56: 2HQS  
Group 57: 2HRK  
Group 58: 2IDO  
Group 59: 2MTA  
Group 60: 2O3B  
Group 61: 2OOR  
Group 62: 2VDB  
Group 63: 2Z0E

120 target protein complexes from ZDock benchmark (Ver. 4.0) was classified into groups considering their structural similarity. If both of the two protein structures of complexes have over a TM-score of 0.5 and the sequence identity over 30%, then the complexes were clustered in the same group.

**Supplementary Table S2.** Splits of the 63 target groups for training and testing the network.

| <b>Split</b> | <b>PDB ID</b>                                                                                                                                                                                                                                                                                                                                                                                                                                                                                                                                                     |
|--------------|-------------------------------------------------------------------------------------------------------------------------------------------------------------------------------------------------------------------------------------------------------------------------------------------------------------------------------------------------------------------------------------------------------------------------------------------------------------------------------------------------------------------------------------------------------------------|
| 1            | 1AKJ(1), 1B6C(4), 1FFW(14), 1GXD(18), 2J0T(18), 1IJK(21), 1JK9(23), 1KAC(27), 1ML0(31), 1OC0(34), 1PXV(37), 1S1Q(41), 1XD3(41), 2AYO(41), 2O0B(41), 1US7(45), 2B4J(53), 2HQS(56), 2MTA(59), 2Z0E(63)                                                                                                                                                                                                                                                                                                                                                              |
| 2            | 1BUH(5), 1FQ1(5), 1JWH(5), 2OZA(5), 1A2K(8), 1I2M(8), 1BKD(8), 1HE1(8), 1HE8(8), 1WQ1(8), 2FJU(8), 2OT3(8), 3CPH(8), 1I4D(8), 2NZ8(8), 1F34(11), 3D5S(15), 1H9D(19), 1JTG(24), 1SBB(28), 1MQ8(32), 1QA9(38), 1SYX(42), 2A5T(50), 2HRK(57), 2O3B(60)                                                                                                                                                                                                                                                                                                               |
| 3            | 1AY7(2), 1DFJ(6), 1EER(9), 1F51(12), 1GLA(16), 1HCF(20), 1JZD(25), 1Z5Y(25), 1KTZ(29), 1ACB(35), 1AVX(35), 1CGI(35), 1D6R(35), 1EAW(35), 1EZX(35), 1FAK(35), 1FLE(35), 1GL1(35), 1HIA(35), 2SNI(35), 2UUY(35), 1AHW(35), 1BJ1(35), 1BVK(35), 1DQJ(35), 1E6J(35), 1FSK(35), 1I9R(35), 1IQD(35), 1JPS(35), 1KXQ(35), 1VFB(35), 1WEJ(35), 2FD6(35), 2JEL(35), 1AK4(35), 1RV6(35), 2I25(35), 1BVN(35), 1CLV(35), 1TMQ(35), 1R0R(35), 3SGQ(35), 1K4C(35), 1QFW(35), 2SIC(35), 2I9B(35), 1R6Q(39), 1T6B(43), 1XQS(46), 1ZHI(48), 2AJF(51), 2CFH(54), 2IDO(58), 2OOR(61) |
| 4            | 1AZS(3), 1FC2(7), 1FCC(7), 1EFN(10), 1GCQ(10), 2O8V(13), 1GPW(17), 1JIW(22), 1K74(26), 1MAH(30), 1NW9(33), 1PVH(36), 1RLB(40), 1UDI(44), 1XU1(47), 2ABZ(49), 2B42(52), 2HLE(55), 2VDB(62)                                                                                                                                                                                                                                                                                                                                                                         |

These are the four subsets of the 63 groups that were used for the four-fold cross validation. In the parentheses, the group IDs from the Supplementary Table S1 are shown.

**Supplementary Table S3.** Hyper-parameters determined during the training and validation.

| <b>Features</b>     | <b>Learning Rate</b> | <b>L2 Regularization</b> |
|---------------------|----------------------|--------------------------|
| ATOM20              | 0.0005               | 0.0002                   |
|                     | 0.0005               | 0.0002                   |
|                     | 0.0005               | 0.0002                   |
|                     | 0.0008               | 0.0008                   |
| ATOM40              | 0.001                | 0.0001                   |
|                     | 0.0005               | 0.0001                   |
|                     | 0.0005               | 0.001                    |
|                     | 0.0005               | 0.0003                   |
| GOAP                | 0.0005               | 0.0001                   |
|                     | 0.0005               | 0.0001                   |
|                     | 0.0005               | 0.0001                   |
|                     | 0.0005               | 0.0001                   |
| ITScore             | 0.0005               | 0.0002                   |
|                     | 0.0006               | 0.0002                   |
|                     | 0.0005               | 0.0002                   |
|                     | 0.0005               | 0.0002                   |
| ATOM40-GOAP         | 0.0005               | 0.0002                   |
|                     | 0.0005               | 0.0002                   |
|                     | 0.0005               | 0.0003                   |
|                     | 0.0005               | 0.0005                   |
| ATOM40-ITScore      | 0.0005               | 0.0002                   |
|                     | 0.0005               | 0.0002                   |
|                     | 0.0006               | 0.0004                   |
|                     | 0.0005               | 0.0001                   |
| GOAP-ITScore        | 0.0005               | 0.0002                   |
|                     | 0.0005               | 0.0002                   |
|                     | 0.0005               | 0.0002                   |
|                     | 0.0005               | 0.0002                   |
| ATOM40-GOAP-ITScore | 0.0005               | 0.0001                   |
|                     | 0.0005               | 0.0002                   |
|                     | 0.0005               | 0.0002                   |
|                     | 0.0005               | 0.0002                   |

For each feature combination, four hyper-parameter value combinations are shown that come from four-fold cross validation. The range of the values tested were 1e-9, 1e-8, 1e-7, 1e-6, ..., 0.1. After the best combinations of the learning rate and the L2 normalization were determined from these combinations, then values within the ranges were randomly tried to seek for better results.

**Supplementary Figure S1.** Prediction accuracy in Training and validation.

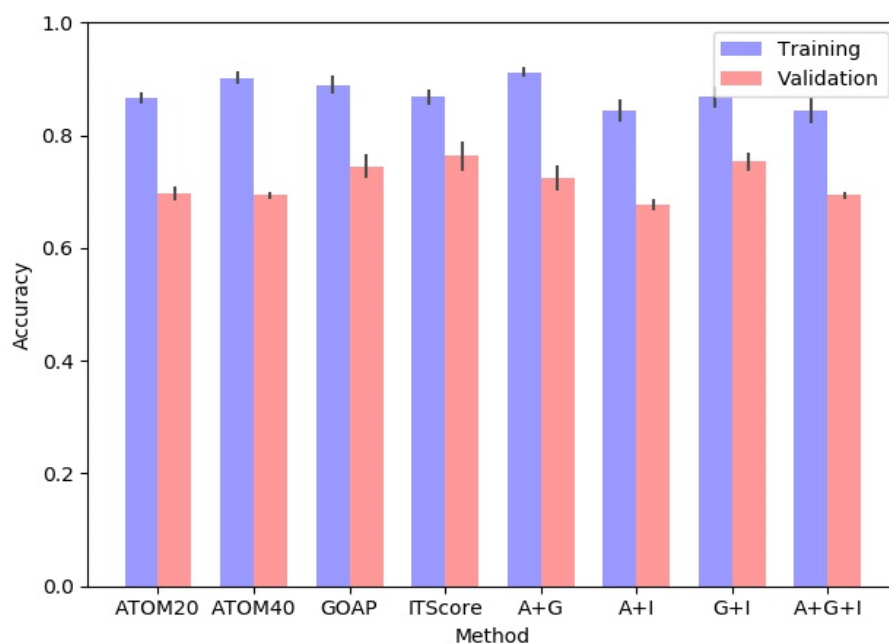

The accuracies (i.e. the number of correctly recognized correct and incorrect decoys over the total number of decoys) during the training and validation phase using eight different feature combinations are shown. Results shown are the average and the standard deviation observed in the four training and four validation sets in the four-fold cross validation.

The feature combinations are indicated with abbreviations: A+G, Atom40+GOAP; A+I, Atom+ITScore; G+I, GOAP+ITscore; A+G+I, Atom40+GOAP+ITScore.

**Supplementary Figure S2. Comparison on the ZDOCK Benchmark dataset considering only medium quality models.** 99 complexes among the 120 complexes in the benchmark set that have at least one medium quality models were used for this evaluation. On average there were 51.0 medium quality models in a decoy set of a complex.

**A,** The fraction of complexes among the 99 complexes for which each method selected at least one medium quality model (within top x scored models) was plotted. Results shown are from test sets. In addition to DOVE with eight different feature combinations, performance of GOAP, GOAP-Interface, ITScore, ITScore-Interface, Zrank, Zrank2, and irad are shown. **B,** Considering the similar complexes that were grouped into 54 groups (Supplementary Table S1), the hit rates for complexes in each group were averaged and re-averaged over the 54 groups for each x.

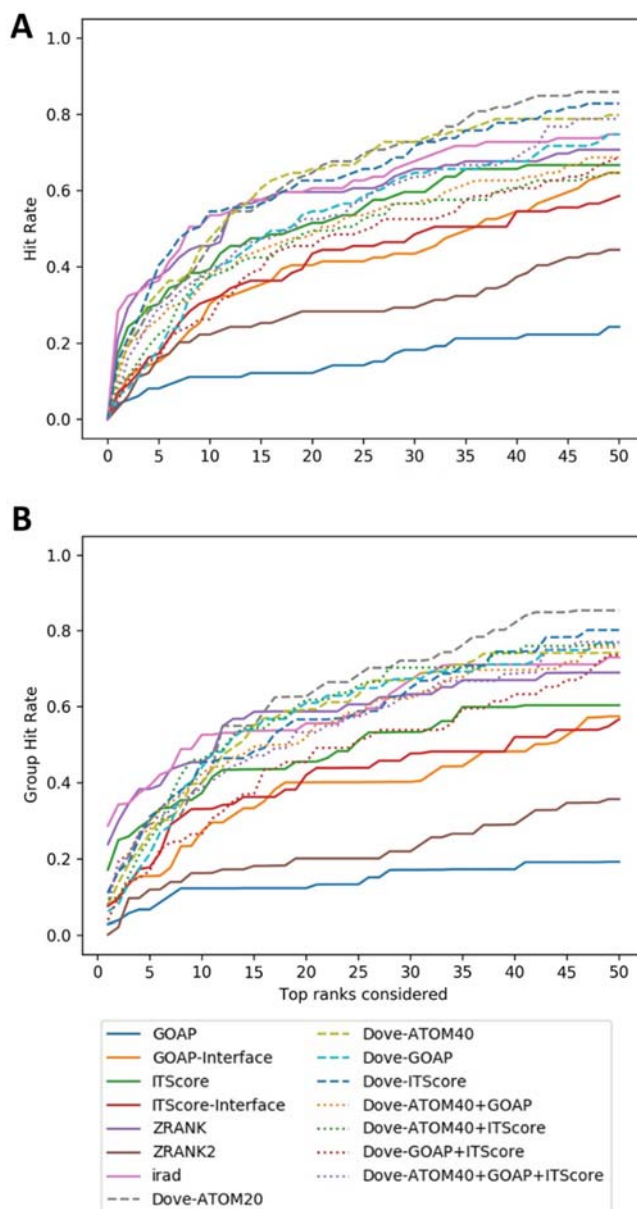

**Supplementary Figure S3. Comparison of the fraction of correct decoys among top 10 and top 50 by GOAP/ITScore and DOVE-GOAP/ITScore.** Results on 120 targets were compared. Left panel, GOAP; right panel, ITScore. Comparison on the top 20 ranked decoys are shown as Fig. 4 in the main manuscript.

### Top 10

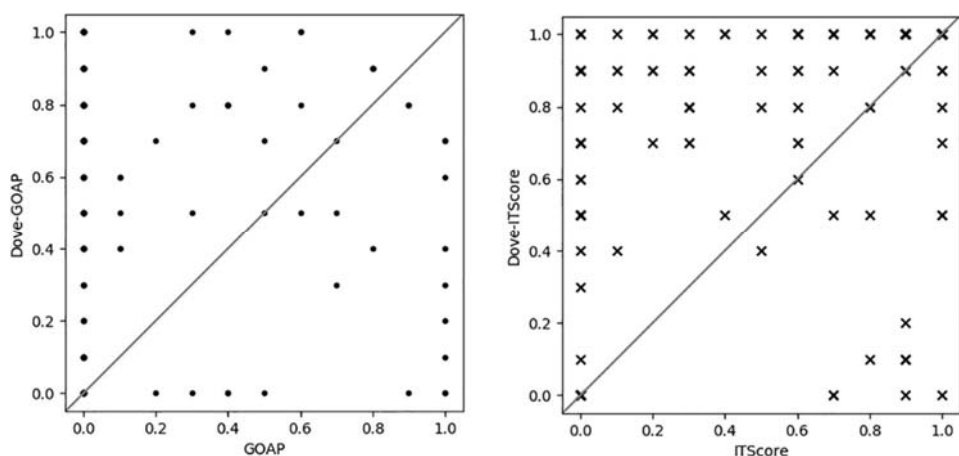

Dove-GOAP showed a higher hit fraction than GOAP for 85 cases, tied for 14 cases, and worse for 21 cases. Dove-ITScore showed a higher hit fraction than ITScore for 73 cases, tied for 29 cases, and worse for 18 cases.

### Top 50

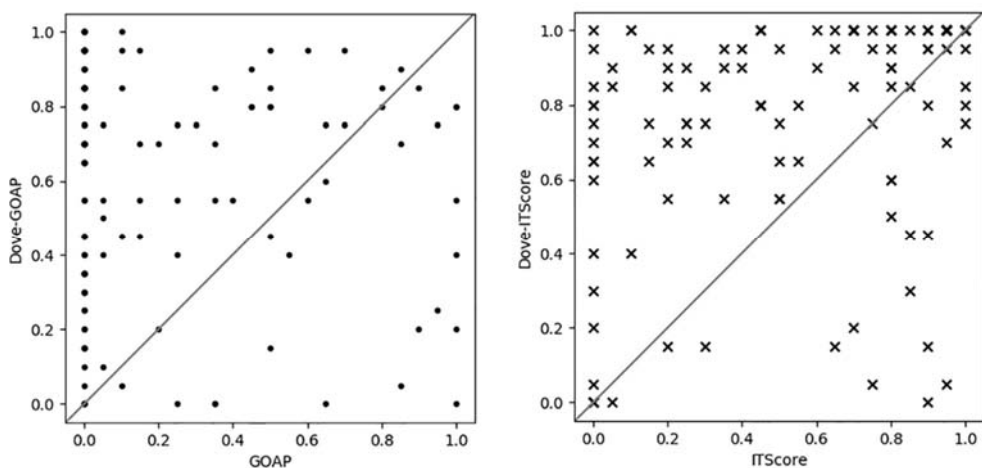

Dove-GOAP showed a higher hit fraction than GOAP for 100 cases, tied for 4 cases, and worse for 16 cases. Dove-ITScore showed a higher hit fraction than ITScore for 91 cases, tied for 5 cases, and worse for 24 cases.

### Supplementary Figure S3. The average and the standard deviation of the top 10 hit rates of Dove on the Dockground dataset.

Results using four models from the four-fold cross validation on the ZDOCK dataset were used to compute the average and standard deviation.

#### A. 33 independent targets.

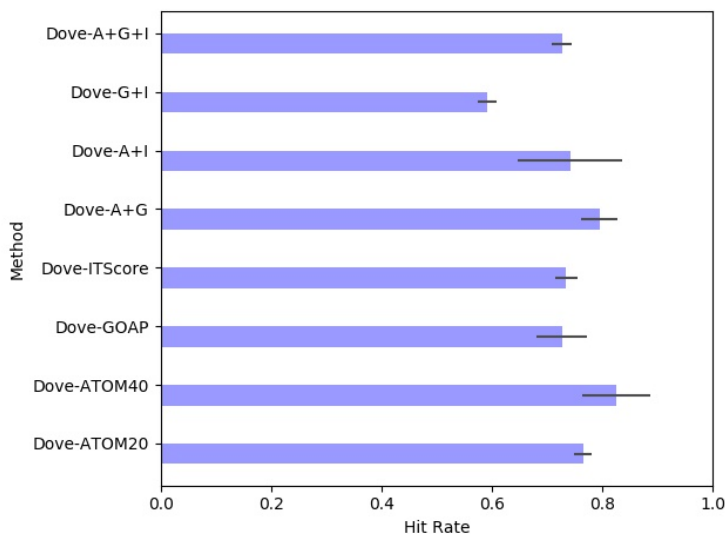

The 33 target complexes are not similar (do not satisfy TM-score  $> 0.5$  for both proteins in a complex) to any of the complexes in the ZDOCK benchmark dataset. A+G, Atom40+GOAP; A+I, Atom40 + ITScore; G+I, GOAP + ITScore; A+G+I, Atom40+GOAP+ITscore. The standard deviation values were: 0.019, 0.017, 0.094, 0.033, 0.020, 0.046, 0.061, and 0.017, respectively, from the top to the bottom bar.

#### B. 25 targets that are similar to complexes in ZDOCK dataset.

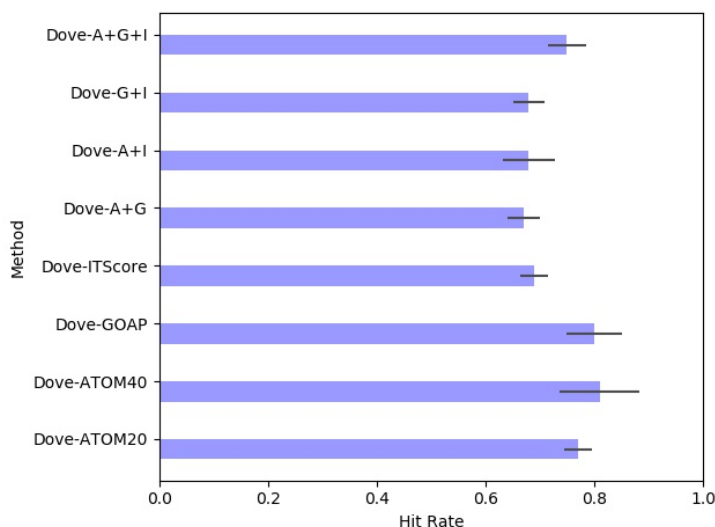

The standard deviations were 0.036, 0.028, 0.047, 0.030, 0.026, 0.051, 0.073, and 0.026, respectively, from the top to the bottom bar.
